# Supplementary material for: Comparison between Pola-R-CHP and R-CHOP regimens in patients newly diagnosed with diffuse large B-cell lymphoma: a propensity score-matched study
Source: Research Square preprint supplement (doi:10.21203/rs.3.rs-6002727/v1), 2025-02-25
Supplement: Supplementary file 1 [file 051f32ab791b34ac55d0a575.docx]

**Journal name:** *Annals of Hematology*

**Comparison between Pola-R-CHP and R-CHOP regimens in patients newly diagnosed with diffuse large B-cell lymphoma:** **a propensity score‑matched study**

Yohei Sasakia,b,*, Manabu Matsunawab, Hidenori Hayashia, Natsuki Kawamataa, Kazuki Nagaoa, Kai Kuroiwaa, Hinako Naritaa, Reiko Okamuraa, Shotaro Shimadaa, Megumi Watanukia, Nana Araia, Yukiko Kawaguchia, Kouji Yanagisawaa, and Norimichi Hattoria

a Division of Hematology, Department of Medicine, Showa University School of Medicine, 1-5-8 Hatanodai, Shinagawa-Ku, Tokyo 142-8666, Japan

b Department of Internal Medicine, Showa University Northern Yokohama Hospital, 35-1 Chigasakichuo, Tsuzuki-Ku, Yokohama-Shi, Kanagawa 224-8503, Japan

* Corresponding Author: Yohei Sasaki

Division of Hematology, Department of Medicine, Showa University School of Medicine, 1-5-8 Hatanodai, Shinagawa-Ku, Tokyo 142-8666, Japan

Phone: +81-3-3784-8338

Fax: +81-3-3784-8250

E-mail: [ysasaki@med.showa-u.ac.jp](about:blank)

Online Resource 4. Univariate analysis of 86 patients newly diagnosed with DLBCL treated with Pola-R-CHP and assessed using FISH and immunohistochemistry

| Clinical factor | | n | % 1-year PFS | | *p* | % 1-year OS | | *p* |  |
| --- | --- | --- | --- | --- | --- | --- | --- | --- | --- |
| *MYC* rearrangement | |  |  |  |  |  |  |  |  |
|  | Positive | 7 (8) | 63 |  |  | 100 |  |  |  |
|  | Negative | 35 (41) | 87 |  | 0.39 | 90 |  | 0.70 |  |
| *BCL2* rearrangement | |  |  |  |  |  |  |  |  |
|  | Positive | 12 (14) | 82 |  |  | 92 |  |  |  |
|  | Negative | 35 (41) | 84 |  | 0.38 | 93 |  | 0.31 |  |
| *BCL6* rearrangement | |  |  |  |  |  |  |  |  |
|  | Positive | 6 (7) | 100 |  |  | 100 |  |  |  |
|  | Negative | 15 (17) | 68 |  | 0.28 | 79 |  | 0.35 |  |
| *MYC/BCL2* double hit lymphoma | |  |  |  |  |  |  |  |  |
|  | Yes | 5 (6) | 75 |  |  | 100 |  |  |  |
|  | No | 42 (49) | 85 |  | 0.76 | 91 |  | 0.35 |  |
| CD5 expression | |  |  |  |  |  |  |  |  |
|  | High | 4 (5) | 100 |  |  | 100 |  |  |  |
|  | Low | 77 (90) | 85 |  | 0.45 | 92 |  | 0.60 |  |
| CD10 expression | |  |  |  |  |  |  |  |  |
|  | High | 25 (29) | 77 |  |  | 86 |  |  |  |
|  | Low | 61 (71) | 90 |  | 0.084 | 96 |  | **0.041** |  |
| MUM-1 expression | |  |  |  |  |  |  |  |  |
|  | High | 48 (56) | 93 |  |  | 95 |  |  |  |
|  | Low | 27 (31) | 78 |  | 0.093 | 96 |  | 0.63 |  |
| BCL6 expression | |  |  |  |  |  |  |  |  |
|  | High | 59 (69) | 90 |  |  | 94 |  |  |  |
|  | Low | 20 (23) | 73 |  | 0.21 | 92 |  | 0.45 |  |
| MYC expression | |  |  |  |  |  |  |  |  |
|  | High | 13 (15) | 82 |  |  | 90 |  |  |  |
|  | Low | 35 (41) | 87 |  | 0.41 | 94 |  | 0.84 |  |
| BCL2 expression | |  |  |  |  |  |  |  |  |
|  | High | 64 (74) | 83 |  |  | 93 |  |  |  |
|  | Low | 18 (21) | 92 |  | 0.21 | 92 |  | 0.72 |  |
| Double expression lymphoma | |  |  |  |  |  |  |  |  |
|  | Yes | 11 (13) | 90 |  |  | 100 |  |  |  |
|  | No | 39 (45) | 85 |  | 0.72 | 91 |  | 0.35 |  |

DLBCL, diffuse large B-cell lymphoma; OS, overall survival; PFS, progression free survival;

Pola-R-CHP, polatuzumab vedotin, rituximab, cyclophosphamide, doxorubicin, prednisolone.

Data are presented as n (%).
