# Supplementary material for: Comparison between Pola-R-CHP and R-CHOP regimens in patients newly diagnosed with diffuse large B-cell lymphoma: a propensity score-matched study
Source: Research Square preprint supplement (doi:10.21203/rs.3.rs-6002727/v1), 2025-02-25
Supplement: Supplementary file 2 [file 3c278c2fbc6271ea5ab93f67.docx]

**Journal name:** *Annals of Hematology*

**Comparison between Pola-R-CHP and R-CHOP regimens in patients newly diagnosed with diffuse large B-cell lymphoma:** **a propensity score‑matched study**

Yohei Sasakia,b,*, Manabu Matsunawab, Hidenori Hayashia, Natsuki Kawamataa, Kazuki Nagaoa, Kai Kuroiwaa, Hinako Naritaa, Reiko Okamuraa, Shotaro Shimadaa, Megumi Watanukia, Nana Araia, Yukiko Kawaguchia, Kouji Yanagisawaa, and Norimichi Hattoria

a Division of Hematology, Department of Medicine, Showa University School of Medicine, 1-5-8 Hatanodai, Shinagawa-Ku, Tokyo 142-8666, Japan

b Department of Internal Medicine, Showa University Northern Yokohama Hospital, 35-1 Chigasakichuo, Tsuzuki-Ku, Yokohama-Shi, Kanagawa 224-8503, Japan

* Corresponding Author: Yohei Sasaki

Division of Hematology, Department of Medicine, Showa University School of Medicine, 1-5-8 Hatanodai, Shinagawa-Ku, Tokyo 142-8666, Japan

Phone: +81-3-3784-8338

Fax: +81-3-3784-8250

E-mail: [ysasaki@med.showa-u.ac.jp](about:blank)

Online Resource 2. Characteristics of patients with DLBCL after PSM

|  |  |  |  |  |  | Pola-R-CHP |  | R-CHOP |
| --- | --- | --- | --- | --- | --- | --- | --- | --- |
| Variable | |  |  |  |  | (n=82) |  | (n=82) |
| FISH analysis | |  |  |  |  |  |  |  |
| *MYC* rearrangement | | |  |  |  |  |  |  |
|  | Positive |  |  |  |  | 7 (9) |  | 3 (4) |
|  | Negative |  |  |  |  | 34 (41) |  | 8 (10) |
|  | Unknown |  |  |  |  | 41 (50) |  | 71 (86) |
| *BCL2* rearrangement | | |  |  |  |  |  |  |
|  | Positive |  |  |  |  | 12 (14) |  | 9 (11) |
|  | Negative |  |  |  |  | 35 (43) |  | 8 (10) |
|  | Unknown |  |  |  |  | 35 (43) |  | 65 (79) |
| *BCL6* rearrangement | | |  |  |  |  |  |  |
|  | Positive |  |  |  |  | 6 (7) |  | 4 (5) |
|  | Negative |  |  |  |  | 14 (17) |  | 5 (6) |
|  | Unknown |  |  |  |  | 62 (76) |  | 73 (89) |
| *MYC/BCL2* double hit | | |  |  |  |  |  |  |
|  | Yes |  |  |  |  | 5 (6) |  | 2 (2) |
|  | No |  |  |  |  | 41 (50) |  | 0 (0) |
|  | Unknown |  |  |  |  | 36 (44) |  | 80 (98) |
| Immunohistochemistry analysis | | | |  |  |  |  |  |
| CD5 expression | | |  |  |  |  |  |  |
|  | High |  |  |  |  | 4 (5) |  | 9 (11) |
|  | Low |  |  |  |  | 74 (90) |  | 68 (83) |
|  | Unknown |  |  |  |  | 4 (5) |  | 5 (6) |
| CD10 expression | | |  |  |  |  |  |  |
|  | High |  |  |  |  | 24 (29) |  | 27 (33) |
|  | Low |  |  |  |  | 58 (71) |  | 55 (67) |
| MUM-1 expression | | |  |  |  |  |  |  |
|  | High |  |  |  |  | 48 (58) |  | 57 (69) |
|  | Low |  |  |  |  | 26 (32) |  | 18 (22) |
|  | Unknown |  |  |  |  | 8 (10) |  | 7 (9) |
| MYC expression | | |  |  |  |  |  |  |
|  | High |  |  |  |  | 13 (16) |  | 20 (25) |
|  | Low |  |  |  |  | 35 (43) |  | 57 (69) |
|  | Unknown |  |  |  |  | 34 (41) |  | 5 (6) |
| BCL2 expression | | |  |  |  |  |  |  |
|  | High |  |  |  |  | 62 (76) |  | 63 (77) |
|  | Low |  |  |  |  | 17 (20) |  | 10 (12) |
|  | Unknown |  |  |  |  | 3 (4) |  | 9 (11) |
| BCL6 expression | | |  |  |  |  |  |  |
|  | High |  |  |  |  | 58 (71) |  | 50 (61) |
|  | Low |  |  |  |  | 20 (24) |  | 25 (30) |
|  | Unknown |  |  |  |  | 4 (5) |  | 7 (9) |
| Double protein expression | | | |  |  |  |  |  |
|  | Yes |  |  |  |  | 11 (13) |  | 16 (20) |
|  | No |  |  |  |  | 39 (48) |  | 61 (74) |
|  | Unknown |  |  |  |  | 32 (39) |  | 5 (6) |

DLBCL, diffuse large B-cell lymphoma; Pola-R-CHP, polatuzumab vedotin, rituximab, cyclophosphamide, doxorubicin, prednisolone; PSM, propensity score matching; R-CHOP, rituximab, cyclophosphamide, doxorubicin, vincristine, prednisolone.

Data are presented as n (%).
