# Supplementary material for: Comparison between Pola-R-CHP and R-CHOP regimens in patients newly diagnosed with diffuse large B-cell lymphoma: a propensity score-matched study
Source: Research Square preprint supplement (doi:10.21203/rs.3.rs-6002727/v1), 2025-02-25
Supplement: Supplementary file 3 [file 7ee70613683e38f06a15e3c8.docx]

**Journal name:** *Annals of Hematology*

**Comparison between Pola-R-CHP and R-CHOP regimens in patients newly diagnosed with diffuse large B-cell lymphoma:** **a propensity score‑matched study**

Yohei Sasakia,b,*, Manabu Matsunawab, Hidenori Hayashia, Natsuki Kawamataa, Kazuki Nagaoa, Kai Kuroiwaa, Hinako Naritaa, Reiko Okamuraa, Shotaro Shimadaa, Megumi Watanukia, Nana Araia, Yukiko Kawaguchia, Kouji Yanagisawaa, and Norimichi Hattoria

a Division of Hematology, Department of Medicine, Showa University School of Medicine, 1-5-8 Hatanodai, Shinagawa-Ku, Tokyo 142-8666, Japan

b Department of Internal Medicine, Showa University Northern Yokohama Hospital, 35-1 Chigasakichuo, Tsuzuki-Ku, Yokohama-Shi, Kanagawa 224-8503, Japan

* Corresponding Author: Yohei Sasaki

Division of Hematology, Department of Medicine, Showa University School of Medicine, 1-5-8 Hatanodai, Shinagawa-Ku, Tokyo 142-8666, Japan

Phone: +81-3-3784-8338

Fax: +81-3-3784-8250

E-mail: [ysasaki@med.showa-u.ac.jp](about:blank)


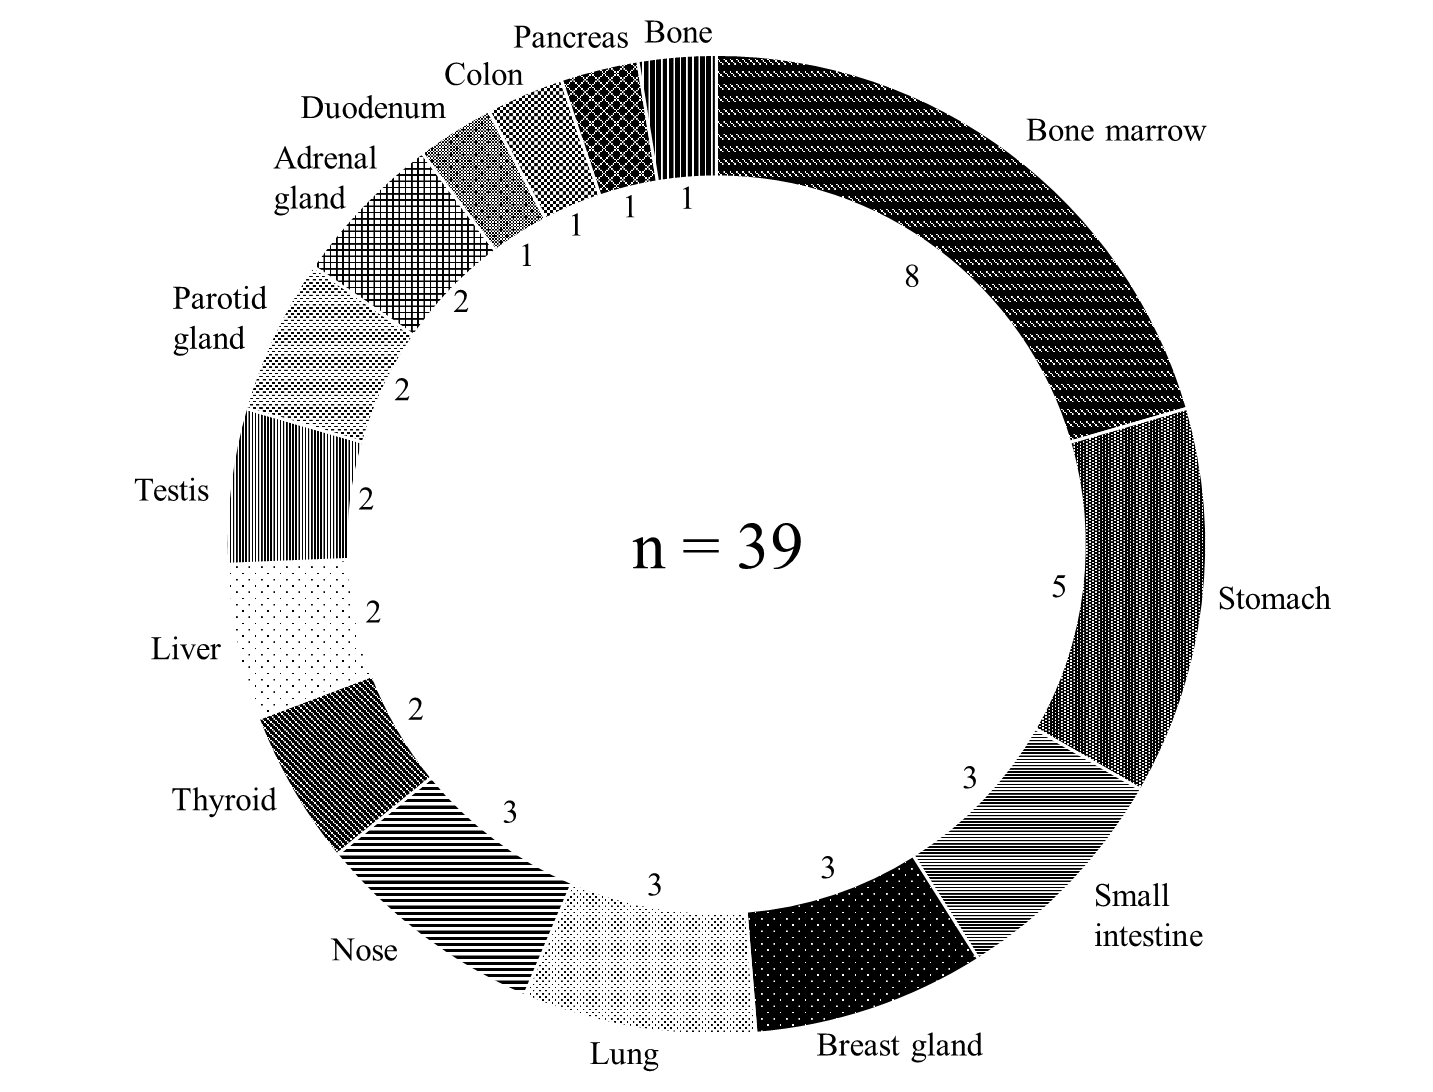

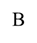

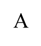

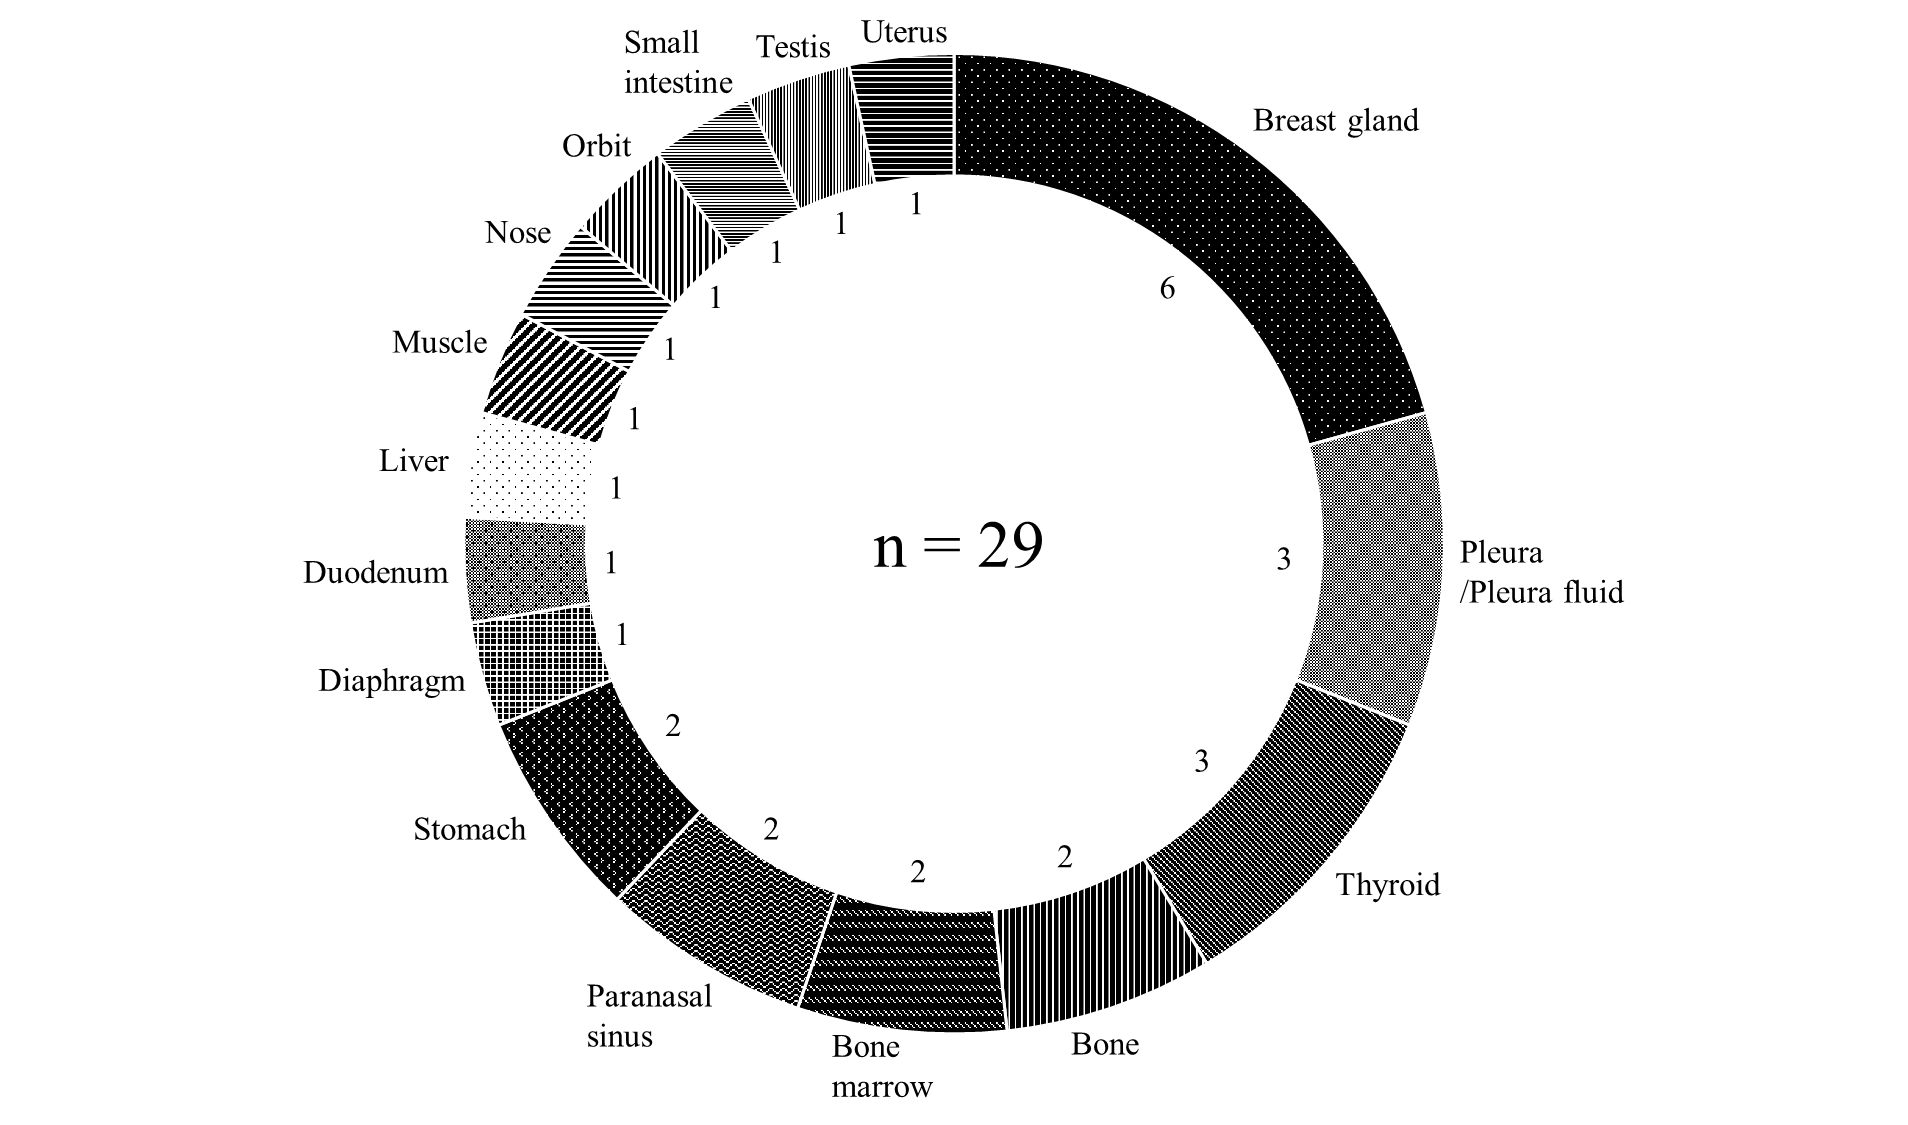


Online Resource 3. After propensity score matching, the overall distribution of extranodal sites in patients with newly diagnosed extranodal diffuse large B-cell lymphoma treated with **(A)** polatuzumab vedotin, rituximab, cyclophosphamide, doxorubicin, and prednisolone (Pola-R-CHP) and **(B)** rituximab, cyclophosphamide, doxorubicin, vincristine, and prednisolone (R-CHOP).
