# Supplementary material for: Comparison between Pola-R-CHP and R-CHOP regimens in patients newly diagnosed with diffuse large B-cell lymphoma: a propensity score-matched study
Source: Research Square preprint supplement (doi:10.21203/rs.3.rs-6002727/v1), 2025-02-25
Supplement: Supplementary file 4 [file ba5a4101d364f26919efd205.docx]

**Journal name:** *Annals of Hematology*

**Comparison between Pola-R-CHP and R-CHOP regimens in patients newly diagnosed with diffuse large B-cell lymphoma:** **a propensity score‑matched study**

Yohei Sasakia,b,*, Manabu Matsunawab, Hidenori Hayashia, Natsuki Kawamataa, Kazuki Nagaoa, Kai Kuroiwaa, Hinako Naritaa, Reiko Okamuraa, Shotaro Shimadaa, Megumi Watanukia, Nana Araia, Yukiko Kawaguchia, Kouji Yanagisawaa, and Norimichi Hattoria

a Division of Hematology, Department of Medicine, Showa University School of Medicine, 1-5-8 Hatanodai, Shinagawa-Ku, Tokyo 142-8666, Japan

b Department of Internal Medicine, Showa University Northern Yokohama Hospital, 35-1 Chigasakichuo, Tsuzuki-Ku, Yokohama-Shi, Kanagawa 224-8503, Japan

* Corresponding Author: Yohei Sasaki

Division of Hematology, Department of Medicine, Showa University School of Medicine, 1-5-8 Hatanodai, Shinagawa-Ku, Tokyo 142-8666, Japan

Phone: +81-3-3784-8338

Fax: +81-3-3784-8250

E-mail: [ysasaki@med.showa-u.ac.jp](about:blank)

Online Resource 1. Characteristics of patients with DLBCL treated with Pola-R-CHP assessed using FISH and immunohistochemistry

| Variable | |  |  |  | Pola-R-CHP (n=86) |
| --- | --- | --- | --- | --- | --- |
| FISH analysis | |  |  |  |  |
| *MYC* rearrangement | | |  |  |  |
|  | Positive |  |  |  | 7 (8) |
|  | Negative |  |  |  | 35 (41) |
|  | Unknown |  |  |  | 44 (51) |
| *BCL2* rearrangement | | |  |  |  |
|  | Positive |  |  |  | 12 (14) |
|  | Negative |  |  |  | 35 (41) |
|  | Unknown |  |  |  | 39 (45) |
| *BCL6* rearrangement | | |  |  |  |
|  | Positive |  |  |  | 6 (7) |
|  | Negative |  |  |  | 15 (17) |
|  | Unknown |  |  |  | 65 (76) |
| *MYC/BCL2* double hit | | |  |  |  |
|  | Yes |  |  |  | 5 (6) |
|  | No |  |  |  | 42 (49) |
|  | Unknown |  |  |  | 39 (45) |
| Immunohistochemistry analysis | | | |  |  |
| CD5 expression | |  |  |  |  |
|  | High |  |  |  | 4 (5) |
|  | Low |  |  |  | 77 (89) |
|  | Unknown |  |  |  | 5 (6) |
| CD10 expression | |  |  |  |  |
|  | High |  |  |  | 25 (29) |
|  | Low |  |  |  | 61 (71) |
| MUM-1 expression | | |  |  |  |
|  | High |  |  |  | 48 (56) |
|  | Low |  |  |  | 27 (31) |
|  | Unknown |  |  |  | 11 (13) |
| MYC expression | |  |  |  |  |
|  | High |  |  |  | 13 (15) |
|  | Low |  |  |  | 35 (41) |
|  | Unknown |  |  |  | 38 (44) |
| BCL2 expression | |  |  |  |  |
|  | High |  |  |  | 64 (74) |
|  | Low |  |  |  | 18 (21) |
|  | Unknown |  |  |  | 4 (5) |
| BCL6 expression | |  |  |  |  |
|  | High |  |  |  | 59 (69) |
|  | Low |  |  |  | 20 (23) |
|  | Unknown |  |  |  | 7 (8) |
| Double protein expression | | |  |  |  |
|  | Yes |  |  |  | 11 (13) |
|  | No |  |  |  | 39 (45) |
|  | Unknown |  |  |  | 36 (42) |

DLBCL, diffuse large B-cell lymphoma; Pola-R-CHP, polatuzumab vedotin, rituximab, cyclophosphamide, doxorubicin, prednisolone.

Data are presented as n (%)
